# Supplementary material for: SNP and SCAR Markers for Specific Discrimination of Antler-Shaped Ganoderma lucidum
Source: PubMed Central journal article supplement (PMC6352128; doi:10.3390/microorganisms7010012), 2019-01-09
Supplement: microorganisms-07-00012-s001.pdf [file microorganisms-07-00012-s001.pdf]

```

      490      500      510      520      530      540      550      560      570      580      590      600
ASI-7013  GAAGCTAGTTTCGTGATGAACCTAACTGCTGTGCGCTGGGAAGAAGCTTTTAGTGGAGGAAACTGGAGTAAGATTATGTTTTTTCATAGTAACTCATTGCTTTAAAGTAAAGTATTTTATAGT
ASI-7074  GAAGCTAGTTTCGTGATGAACCTAACTGCTGTGCGCTGGGAAGAAGCTTTTAGTGGAGGAAACTGGAGTAAGATTATGTTTTTTCATAGTAACTCATTGCTTTAAAGTAAAGTATTTTATAGT
ASI-7094  GAAGCTAGTTTCGTGATGAACCTAACTGCTGTGCGCTGGGAAGAAGCTTTTAGTGGAGGAAACTGGAGTAAGATTATGTTTTTTCATAGTAACTCATTGCTTTAAAGTAAAGTATTTTATAGT
ASI-7135  GAAGCTAGTTTCGTGATGAACCTAACTGCTGTGCGCTGGGAAGAAGCTTTTAGTGGAGGAAACTGGAGTAAGATTATGTTTTTTCATAGTAACTCATTGCTTTAAAGTAAAGTATTTTATAGT
ASI-7146  GAAGCTAGTTTCGTGATGAACCTAACTGCTGTGCGCTGGGAAGAAGCTTTTAGTGGAGGAAACTGGAGTAAGATTATGTTTTTTCATAGTAACTCATTGCTTTAAAGTAAAGTATTTTATAGT
ASI-7004  GAAGCTAGTTTCGTGATGAACCTAACTGCTGTGCGCTGGGAAGAAGCTTTTAGTGGAGGAAACTGGAGTAAGATTATGTTTTTTCATAGTAACTCATTGCTTTAAAGTAAAGTATTTTATAGT
ASI-7071  GAAGCTAGTTTCGTGATGAACCTAACTGCTGTGCGCTGGGAAGAAGCTTTTAGTGGAGGAAACTGGAGTAAGATTATGTTTTTTCATAGTAACTCATTGCTTTAAAGTAAAGTATTTTATAGT
ASI-7091  GAAGCTAGTTTCGTGATGAACCTAACTGCTGTGCGCTGGGAAGAAGCTTTTAGTGGAGGAAACTGGAGTAAGATTATGTTTTTTCATAGTAACTCATTGCTTTAAAGTAAAGTATTTTATAGT
IUM-0047  GAAGCTAGTTTCGTGATGAACCTAACTGCTGTGCGCTGGGAAGAAGCTTTTAGTGGAGGAAACTGGAGTAAGATTATGTTTTTTCATAGTAACTCATTGCTTTAAAGTAAAGTATTTTATAGT
IUM-0757  GAAGCTAGTTTCGTGATGAACCTAACTGCTGTGCGCTGGGAAGAAGCTTTTAGTGGAGGAAACTGGAGTAAGATTATGTTTTTTCATAGTAACTCATTGCTTTAAAGTAAAGTATTTTATAGT
IUM-0938  GAAGCTAGTTTCGTGATGAACCTAACTGCTGTGCGCTGGGAAGAAGCTTTTAGTGGAGGAAACTGGAGTAAGATTATGTTTTTTCATAGTAACTCATTGCTTTAAAGTAAAGTATTTTATAGT
IUM-3986  GAAGCTAGTTTCGTGATGAACCTAACTGCTGTGCGCTGGGAAGAAGCTTTTAGTGGAGGAAACTGGAGTAAGATTATGTTTTTTCATAGTAACTCATTGCTTTAAAGTAAAGTATTTTATAGT
IUM-4002  GAAGCTAGTTTCGTGATGAACCTAACTGCTGTGCGCTGGGAAGAAGCTTTTAGTGGAGGAAACTGGAGTAAGATTATGTTTTTTCATAGTAACTCATTGCTTTAAAGTAAAGTATTTTATAGT
IUM-4100  GAAGCTAGTTTCGTGATGAACCTAACTGCTGTGCGCTGGGAAGAAGCTTTTAGTGGAGGAAACTGGAGTAAGATTATGTTTTTTCATAGTAACTCATTGCTTTAAAGTAAAGTATTTTATAGT
ASI-7117  GAAGCTAGTTTCGTGATGAACCTAACTGCTGTGCGCTGGGAAGAAGCTTTTAGTGGAGGAAACTGGAGTAAGATTATGTTTTTTCATAGTAACTCATTGCTTTAAAGTAAAGTATTTTATAGT
IUM-4304  GAAGCTAGTTTCGTGATGAACCTAACTGCTGTGCGCTGGGAAGAAGCTTTTAGTGGAGGAAACTGGAGTAAGATTATGTTTTTTCATAGTAACTCATTGCTTTAAAGTAAAGTATTTTATAGT
IUM-4310  GAAGCTAGTTTCGTGATGAACCTAACTGCTGTGCGCTGGGAAGAAGCTTTTAGTGGAGGAAACTGGAGTAAGATTATGTTTTTTCATAGTAACTCATTGCTTTAAAGTAAAGTATTTTATAGT
KACC42232 GAAGCTAGTTTCGTGATGAACCTAACTGCTGTGCGCTGGGAAGAAGCTTTTAGTGGAGGAAACTGGAGTAAGATTATGTTTTTTCATAGTAACTCATTGCTTTAAAGTAAAGTATTTTATAGT
KACC51689 GAAGCTAGTTTCGTGATGAACCTAACTGCTGTGCGCTGGGAAGAAGCTTTTAGTGGAGGAAACTGGAGTAAGATTATGTTTTTTCATAGTAACTCATTGCTTTAAAGTAAAGTATTTTATAGT
KACC51690 GAAGCTAGTTTCGTGATGAACCTAACTGCTGTGCGCTGGGAAGAAGCTTTTAGTGGAGGAAACTGGAGTAAGATTATGTTTTTTCATAGTAACTCATTGCTTTAAAGTAAAGTATTTTATAGT
ASI-7037  GAAGCTAGTTTCGTGATGAACCTAACTGCTGTGCGCTGGGAAGAAGCTTTTAGTGGAGGAAACTGGAGTAAGATTATGTTTTTTCATAGTAACTCATTGCTTTAAAGTAAAGTATTTTATAGT
KCTC 16802 GAAGCTAGTTTCGTGATGAACCTAACTGCTGTGCGCTGGGAAGAAGCTTTTAGTGGAGGAAACTGGAGTAAGATTATGTTTTTTCATAGTAACTCATTGCTTTAAAGTAAAGTATTTTATAGT
ASI-7068  GAAGCTAGTTTCGTGATGAACCTAACTGCTGTGCGCTGGGAAGAAGCTTTTAGTGGAGGAAACTGGAGTAAGATTATGTTTTTTCATAGTAACTCATTGCTTTAAAGTAAAGTATTTTATAGT
ASI-7152  GAAGCTAGTTTCGTGATGAACCTAACTGCTGTGCGCTGGGAAGAAGCTTTTAGTGGAGGAAACTGGAGTAAGATTATGTTTTTTCATAGTAACTCATTGCTTTAAAGTAAAGTATTTTATAGT

      610      620      630      640      650      660
ASI-7013  ATTATGATAAACTTATTGGATTAGTGAATTCATTAAGGTAACATCTCAAAGTCATAGCA
ASI-7074  ATTATGATAAACTTATTGGATTAGTGAATTCATTAAGGTAACATCTCAAAGTCATAGCA
ASI-7094  ATTATGATAAACTTATTGGATTAGTGAATTCATTAAGGTAACATCTCAAAGTCATAGCA
ASI-7135  ATTATGATAAACTTATTGGATTAGTGAATTCATTAAGGTAACATCTCAAAGTCATAGCA
ASI-7146  ATTATGATAAACTTATTGGATTAGTGAATTCATTAAGGTAACATCTCAAAGTCATAGCA
ASI-7004  ATTATGATAAACTTATTGGATTAGTGAATTCATTAAGGTAACATCTCAAAGTCATAGCA
ASI-7071  ATTATGATAAACTTATTGGATTAGTGAATTCATTAAGGTAACATCTCAAAGTCATAGCA
ASI-7091  ATTATGATAAACTTATTGGATTAGTGAATTCATTAAGGTAACATCTCAAAGTCATAGCA
IUM-0047  ATTATGATAAACTTATTGGATTAGTGAATTCATTAAGGTAACATCTCAAAGTCATAGCA
IUM-0757  ATTATGATAAACTTATTGGATTAGTGAATTCATTAAGGTAACATCTCAAAGTCATAGCA
IUM-0938  ATTATGATAAACTTATTGGATTAGTGAATTCATTAAGGTAACATCTCAAAGTCATAGCA
IUM-3986  ATTATGATAAACTTATTGGATTAGTGAATTCATTAAGGTAACATCTCAAAGTCATAGCA
IUM-4002  ATTATGATAAACTTATTGGATTAGTGAATTCATTAAGGTAACATCTCAAAGTCATAGCA
IUM-4100  ATTATGATAAACTTATTGGATTAGTGAATTCATTAAGGTAACATCTCAAAGTCATAGCA
ASI-7117  ATTATGATAAACTTATTGGATTAGTGAATTCATTAAGGTAACATCTCAAAGTCATAGCA
IUM-4304  ATTATGATAAACTTATTGGATTAGTGAATTCATTAAGGTAACATCTCAAAGTCATAGCA
IUM-4310  ATTATGATAAACTTATTGGATTAGTGAATTCATTAAGGTAACATCTCAAAGTCATAGCA
KACC42232 ATTATGATAAACTTATTGGATTAGTGAATTCATTAAGGTAACATCTCAAAGTCATAGCA
KACC51689 ATTATGATAAACTTATTGGATTAGTGAATTCATTAAGGTAACATCTCAAAGTCATAGCA
KACC51690 ATTATGATAAACTTATTGGATTAGTGAATTCATTAAGGTAACATCTCAAAGTCATAGCA
ASI-7037  ATTATGATAAACTTATTGGATTAGTGAATTCATTAAGGTAACATCTCAAAGTCATAGCA
KCTC 16802 ATTATGATAAACTTATTGGATTAGTGAATTCATTAAGGTAACATCTCAAAGTCATAGCA
ASI-7068  ATTATGATAAACTTATTGGATTAGTGAATTCATTAAGGTAACATCTCAAAGTCATAGCA
ASI-7152  ATTATGATAAACTTATTGGATTAGTGAATTCATTAAGGTAACATCTCAAAGTCATAGCA

```

**Figure S1.** Alignment of partial mitochondrial SSU rDNA sequences of *Ganoderma lucidum* strains. Red arrow indicates the SNP position found from antler-shaped *G. lucidum* strains.
